# Supplementary material for: Integrating gene expression and clinical data to identify drug repurposing candidates for hyperlipidemia and hypertension
Source: PubMed Central journal article supplement (PMC8748496; doi:10.1038/s41467-021-27751-1), 2022-01-10
Supplement: 41467_2021_27751_MOESM1_ESM.pdf [file 41467_2021_27751_MOESM1_ESM.pdf]

**SUPPLEMENTARY INFORMATION**

# Supplementary Figures

**a** This study's contribution in the context of existing bioinformatics approaches to identify drug repurposing candidates.

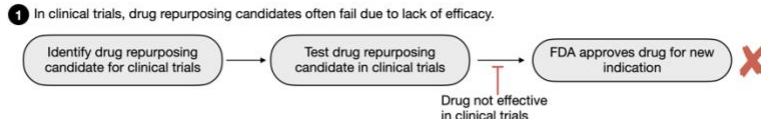

Challenge: How to help investigators choose drug repurposing candidates that are likely to be effective in clinical trials?

2 To identify drug repurposing candidates that are likely to be effective in clinical trials, existing bioinformatics approaches search for drugs that reverse disease gene expression signatures.

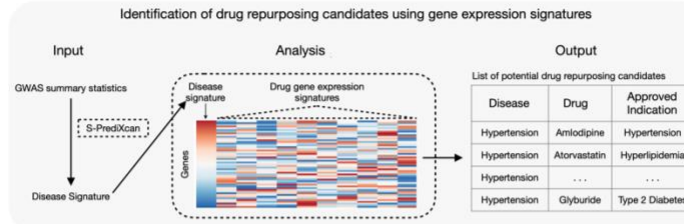

Challenge: Existing bioinformatics approaches often produce long lists of potential drug repurposing candidates, without a high-throughput method to validate candidates.

3 To address this challenge, we developed an approach to clinically validate drug repurposing candidates. Our approach leverages EHR clinical data to estimate the treatment effects for drug repurposing candidates.

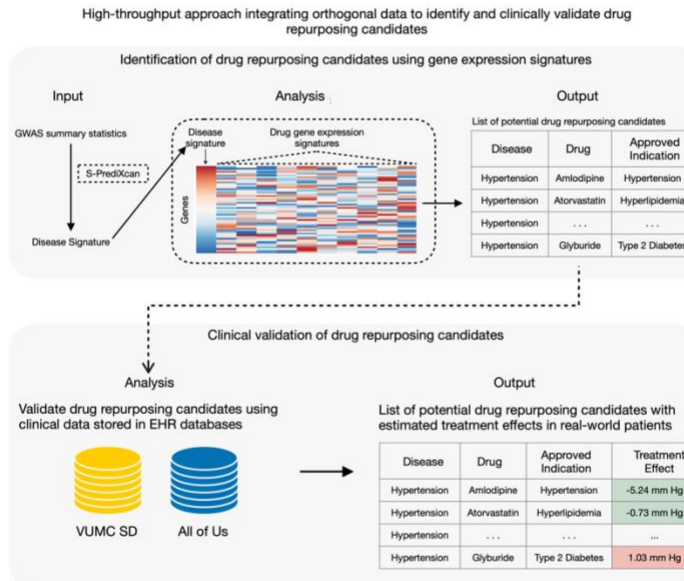

Our approach builds upon existing methods to help clinical trial investigators select drug repurposing candidates, by providing estimated treatment effects in real-world patients.

- Clinical trial investigators may choose to test candidates with the largest estimated treatment effects (with adequate safety profiles).
- Estimated treatment effect data may also help in other areas of clinical trial design, like cohort size and primary outcome parameters.

**b** Integration of genetic and clinical data may increase the prior probability of identifying effective drug repurposing candidates.

1 Prior probability of drug repurposing candidate passing clinical trials (step 1 in **Supp Fig. 1a**).  
 2 Updated prior probability when gene expression data is used to identify drug repurposing candidates (step 2 in **Supp Fig. 1a**).  
 3 Updated prior probability when drug repurposing candidates identified using gene expression data are clinically validated (step 3 in **Supp Fig. 1a**).

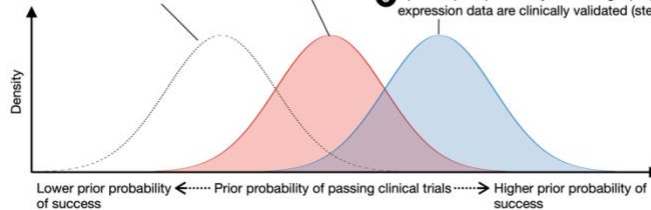

Supplementary Figure 1. **Overview of study's contributions to identifying drug repurposing candidates.** **a** Compared to existing bioinformatics approaches, our approach allows researchers to clinically validate drug repurposing candidates identified from gene expression data. **b** Conceptual framework for the value added by integrating genetic and clinical data to identify drug repurposing candidates for clinical trial testing. Note that this is just an illustration and a formal Bayesian-like analysis was not conducted.

Abbreviations. GWAS: genome-wide association study; EHR: electronic health record; VUMC: Vanderbilt University Medical Center; SD: Synthetic Derivativ

a

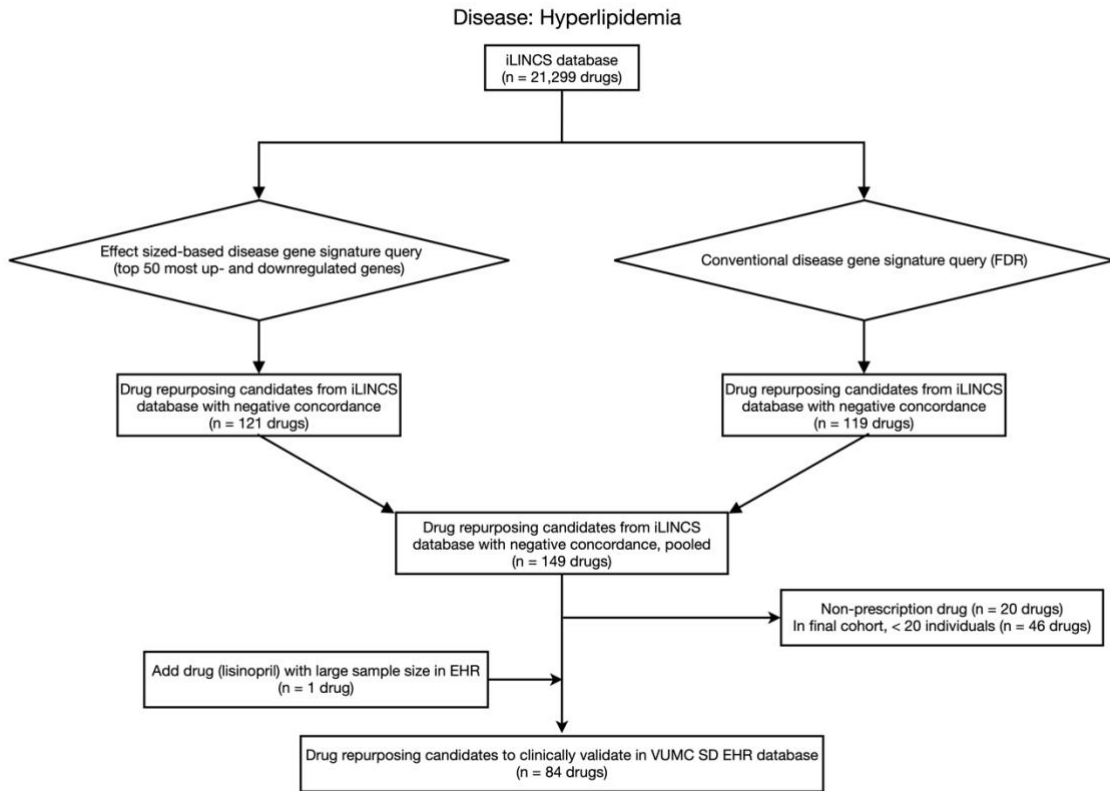

b

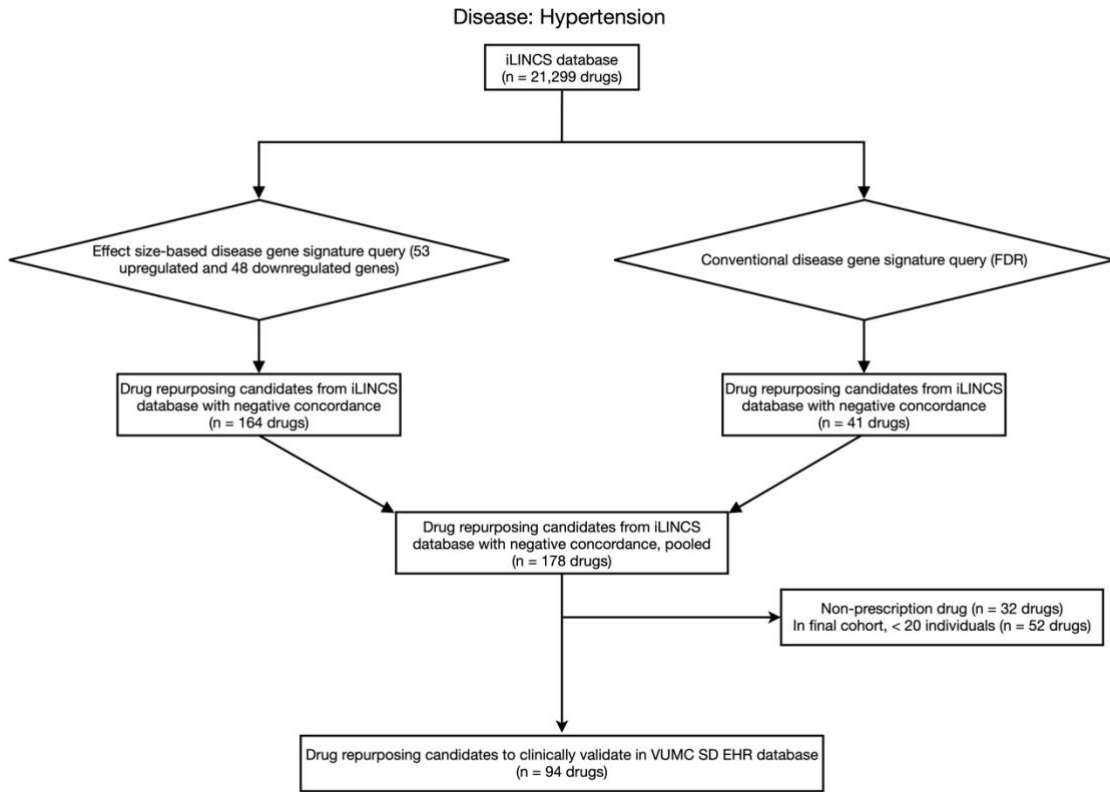

Supplementary Figure 2. **Selection of drug repurposing candidates to clinically validate in VUMC SD.**

**a** Selection of drug repurposing candidates from the iLINCS database to validate in the EHR, for hyperlipidemia. Lisinopril was added as a drug repurposing candidate because like quinapril, one of the drug repurposing candidates from iLINCS, lisinopril is an ACE inhibitor, but is much more commonly prescribed. **b** Selection of drug repurposing candidates from iLINCS database to validate in the EHR, for hypertension.

Abbreviations. VUMC: Vanderbilt University Medical Center; SD: Synthetic Derivative; EHR: electronic health record; iLINCS: Integrative Library of Integrated Network-Based Cellular Signatures; ACE: angiotensin-converting enzyme.

## Supplementary Tables

Supplementary Table 1. Review of existing evidence to confirm the therapeutic effects for hyperlipidemia drug repurposing candidates observed in clinical validation studies.

| Disease        | Drug          | Approved indication  | Existing evidence supports therapeutic effect | Evidence description                                                                                                                                                                |
|----------------|---------------|----------------------|-----------------------------------------------|-------------------------------------------------------------------------------------------------------------------------------------------------------------------------------------|
| Hyperlipidemia | Tamoxifen     | Cancer               | Yes                                           | Breast cancer patients on tamoxifen experienced decreases in total serum cholesterol and LDL-C. <sup>1</sup>                                                                        |
| Hyperlipidemia | Gentamicin    | Bacterial infections | No                                            | Most likely false-positive finding, as chronic drug exposure is uncommon. Also, the treatment effect was no longer statistically significant after removing non-systemic exposures. |
| Hyperlipidemia | Digoxin       | Arrhythmias          | Yes                                           | Apolipoprotein E-deficient mice exposed to digoxin experienced reductions in LDL-C. <sup>2</sup>                                                                                    |
| Hyperlipidemia | Risperidone   | Schizophrenia        | No                                            | Studies show that risperidone either has a negligible effect on or may increase LDL-C levels. <sup>3</sup>                                                                          |
| Hyperlipidemia | Valproate     | Seizure              | Yes                                           | Children with epilepsy on valproic acid had significantly lower mean LDL-C levels compared to healthy children. <sup>4</sup>                                                        |
| Hyperlipidemia | Methocarbamol | Muscle spasms        | No                                            |                                                                                                                                                                                     |
| Hyperlipidemia | Acetaminophen | Pain                 | No                                            |                                                                                                                                                                                     |

Abbreviations. RCT: randomized clinical trial; ACE: angiotensin-converting enzyme; LDL-C: low-density lipoprotein cholesterol; SSRIs: selective serotonin reuptake inhibitors.

Supplementary Table 2: Review of existing evidence to confirm the therapeutic effects for hypertension drug repurposing candidates observed in clinical validation studies.

| Disease      | Drug          | Approved indication  | Existing evidence supports therapeutic effect | Evidence description                                                                                                                                              |
|--------------|---------------|----------------------|-----------------------------------------------|-------------------------------------------------------------------------------------------------------------------------------------------------------------------|
| Hypertension | Caffeine      | Fatigue              | No                                            | Most likely false-positive finding, as caffeine is not commonly prescribed                                                                                        |
| Hypertension | Levofloxacin  | Bacterial infections | Yes                                           | Rapid intravenous infusion of levofloxacin can result in hypotension. <sup>5</sup>                                                                                |
| Hypertension | Doxorubicin   | Cancer               | No                                            | Most likely false-positive finding, as chronic drug exposure is uncommon.                                                                                         |
| Hypertension | Docetaxel     | Cancer               | Yes                                           | SIDER: 2.8% of patients with solid tumors treated with docetaxel experienced hypotension.                                                                         |
| Hypertension | Rosiglitazone | Type 2 Diabetes      | Yes                                           | In an RCT, patients randomized to metformin and rosiglitazone had lower blood pressures than patients randomized to the metformin and placebo group. <sup>6</sup> |
| Hypertension | Gemcitabine   | Cancer               | No                                            | Most likely false-positive finding, as chronic drug exposure is uncommon.                                                                                         |
| Hypertension | Phenytoin     | Seizure              | Yes                                           | DEB2: hypotension is a side effect of phenytoin.                                                                                                                  |
| Hypertension | Simvastatin   | Hyperlipidemia       | Yes                                           | In an RCT, simvastatin was shown to lower blood pressure. <sup>7</sup>                                                                                            |
| Hypertension | Dexamethasone | Inflammation         | No                                            | SIDER: Hypotension can occur due to adrenal insufficiency, but hypertension seems more likely due to increased sodium levels, leading to edema.                   |
| Hypertension | Atorvastatin  | Hyperlipidemia       | Yes                                           | In an RCT, atorvastatin was shown to lower blood pressure. <sup>8</sup>                                                                                           |
| Hypertension | Fluorouracil  | Cancer               | Yes                                           | SIDER: 1% of patients exposed to fluorouracil experienced hypotension.                                                                                            |
| Hypertension | Escitalopram  | Depression           | No                                            | SSRIs have been shown to increase blood pressure. <sup>9</sup>                                                                                                    |
| Hypertension | Estradiol     | Menopause            | Yes                                           | Estradiol exposure was shown to lower blood pressure. <sup>10</sup>                                                                                               |
| Hypertension | Sertraline    | Depression           | No                                            | SSRIs have been shown to increase blood pressure. <sup>9</sup>                                                                                                    |
| Hypertension | Ipratropium   | Asthma               | No                                            | SIDER: hypotension and hypertension are both listed as potential side effects.                                                                                    |
| Hypertension | Celecoxib     | Pain                 | No                                            | SIDER: celecoxib can worsen hypertension.                                                                                                                         |
| Hypertension | Fluoxetine    | Depression           | No                                            | SSRIs have been shown to increase blood pressure. <sup>9</sup>                                                                                                    |

| Disease      | Drug         | Approved indication | Existing evidence supports therapeutic effect | Evidence description                                                                     |
|--------------|--------------|---------------------|-----------------------------------------------|------------------------------------------------------------------------------------------|
| Hypertension | Fexofenadine | Allergic Rhinitis   | No                                            | In an RCT, fexofenadine reduced vasodilation and postexercise hypotension. <sup>11</sup> |

Abbreviations. RCT: randomized clinical trial; SSRIs: selective serotonin reuptake inhibitors.



Supplementary Table 3. Observational database study design catalog.

| Expected time to clinical endpoint after exposure to drug | Study design | Clinical endpoint examples                                                                                                                                      |
|-----------------------------------------------------------|--------------|-----------------------------------------------------------------------------------------------------------------------------------------------------------------|
| Short (weeks-months)                                      | SCCS         | Fasting glucose/HbA1c levels <sup>12,13</sup><br>Cholesterol levels <sup>13</sup><br>Blood pressure <sup>13</sup>                                               |
| Long (years)                                              | Cohort       | Coronary artery disease <sup>14</sup><br>Cancer mortality <sup>15,16</sup><br>Colectomy procedure <sup>17</sup><br>Alzheimer's disease prevalence <sup>18</sup> |

Abbreviations. SCCS: self-controlled case series; HbA1c: hemoglobin A1c

## Supplementary References

1. Dnistrian, A. M., Schwartz, M. K., Greenberg, E. J., Smith, C. A. & Schwartz, D. C. Effect of tamoxifen on serum cholesterol and lipoproteins during chemohormonal therapy. *Clin. Chim. Acta* **223**, 43–52 (1993).
2. Shi, H. *et al.* Digoxin reduces atherosclerosis in apolipoprotein e-deficient mice. *Br. J. Pharmacol.* **173**, 1517–1528 (2016).
3. Newcomer, J. W. Second-Generation (atypical) antipsychotics and metabolic effects. *CNS Drugs* **19**, 1–93 (2005).
4. Eiris, J. M. *et al.* Effects of long-term treatment with antiepileptic drugs on serum lipid levels in children with epilepsy. *Neurology* **45**, 1155–1157 (1995).
5. *LEVOFLOXACIN injection [package insert]. Lake forest, IL: Akorn, inc.* (Akorn, Inc., 2020). <https://dailymed.nlm.nih.gov/dailymed/medguide.cfm?setid=4438fed2-7ef5-488f-baa8-39bc65768d1d>.
6. Negro, R., Mangieri, T., Dazzi, D., Pezzarossa, A. & Hassan, H. Rosiglitazone effects on blood pressure and metabolic parameters in nondipper diabetic patients. *Diabetes Res. Clin. Pract.* **70**, 20–25 (2005).
7. Correa, V., Jr *et al.* Blood pressure-lowering effect of simvastatin: A placebo-controlled randomized clinical trial with 24-h ambulatory blood pressure monitoring. *J. Hum. Hypertens.* **28**, 62–67 (2014).
8. Kanaki, A. I. *et al.* Low-dose atorvastatin reduces ambulatory blood pressure in patients with mild hypertension and hypercholesterolaemia: A double-blind, randomized, placebo-controlled study. *J. Hum. Hypertens.* **26**, 577–584 (2012).
9. Peixoto, M. F., Cesaretti, M., Hood, S. D. & Tavares, A. Effects of SSRI medication on heart rate and blood pressure in individuals with hypertension and depression. *Clin. Exp. Hypertens.* **41**, 428–433 (2019).
10. Seely, E. W., Walsh, B. W., Gerhard, M. D. & Williams, G. H. Estradiol with or without progesterone and ambulatory blood pressure in postmenopausal women. *Hypertension* **33**, 1190–1194 (1999).
11. Lockwood, J. M., Wilkins, B. W. & Halliwill, J. R. H1 receptor-mediated vasodilatation contributes to postexercise hypotension. *J. Physiol.* **563**, 633–642 (2005).
12. Brown, A. S., Rasooly, D. & Patel, C. J. Leveraging Population-Based clinical quantitative phenotyping for drug repositioning. *CPT Pharmacometrics Syst Pharmacol* **7**, 124–129 (2018).
13. Kim, D.-H. *et al.* High-Throughput algorithm for discovering new drug indications by utilizing Large-Scale electronic medical record data. *Clin. Pharmacol. Ther.* **108**, 1299–1307 (2020).
14. Cheng, F. *et al.* Network-based approach to prediction and population-based validation of in silico drug repurposing. *Nat. Commun.* **9**, 2691 (2018).
15. Wu, Y. *et al.* Discovery of noncancer drug effects on survival in electronic health records of patients with cancer: A new paradigm for drug repurposing. *JCO Clin Cancer Inform* **3**, 1–9 (2019).
16. Xu, H. *et al.* Validating drug repurposing signals using electronic health records: A case study of metformin associated with reduced cancer mortality. *J. Am. Med. Inform. Assoc.* **22**, 179–191 (2015).
17. Bai, L. *et al.* Computational drug repositioning of atorvastatin for ulcerative colitis. *J. Am. Med. Inform. Assoc.* (2021) doi:10.1093/jamia/ocab165.

18. Taubes, A. *et al.* Experimental and real-world evidence supporting the computational repurposing of bumetanide for APOE4-related alzheimer's disease. *Nature Aging* **1**, 932–947 (2021).
